# Supplementary material for: Single-Cell Transcriptomic Profiling of the Mouse Testicular Germ Cells Reveals Important Role of Phosphorylated GRTH/DDX25 in Round Spermatid Differentiation and Acrosome Biogenesis during Spermiogenesis
Source: MDPI journal article supplement (doi:10.3390/ijms24043127), 2023-02-04

Supplementary Figure S1

Raw Data [samples]

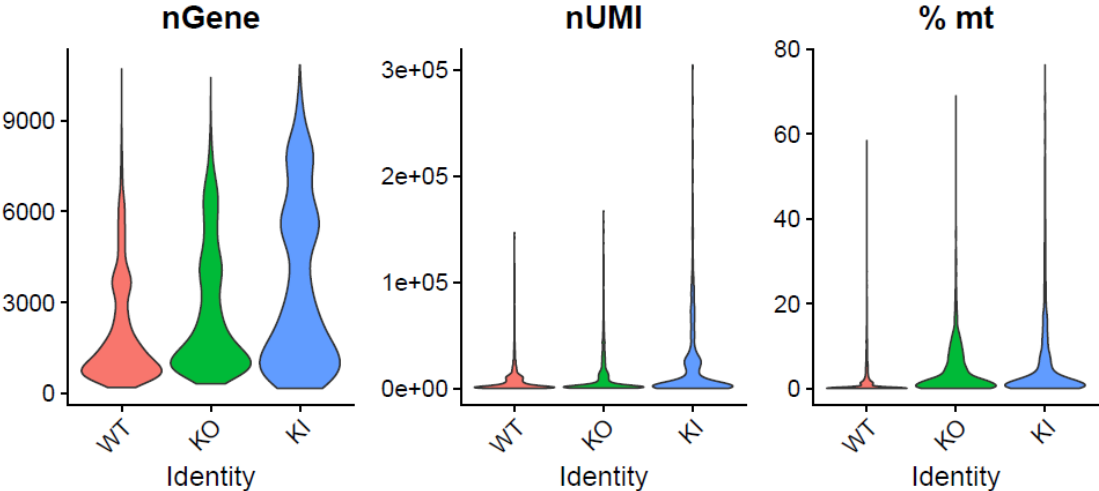

Data after filtration

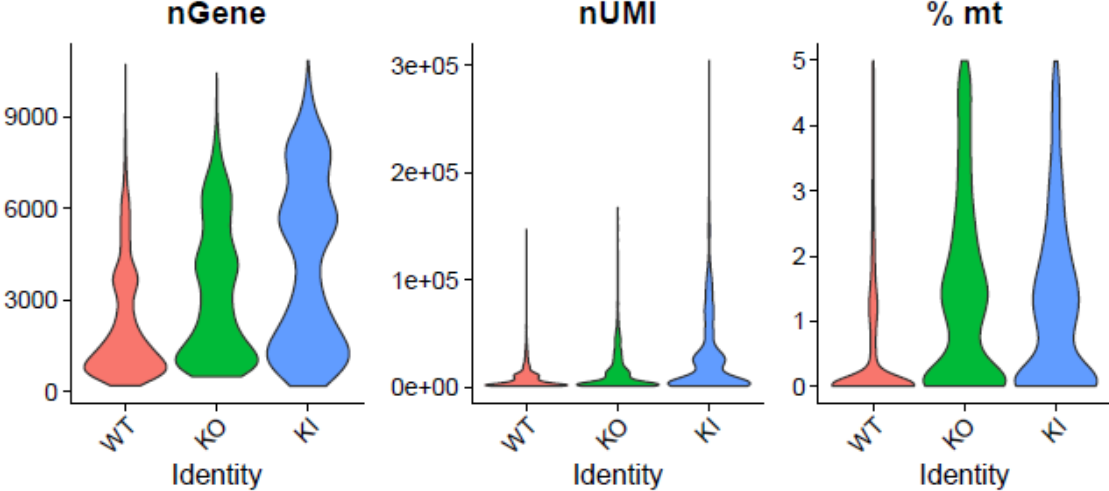

Supplementary Figure S2

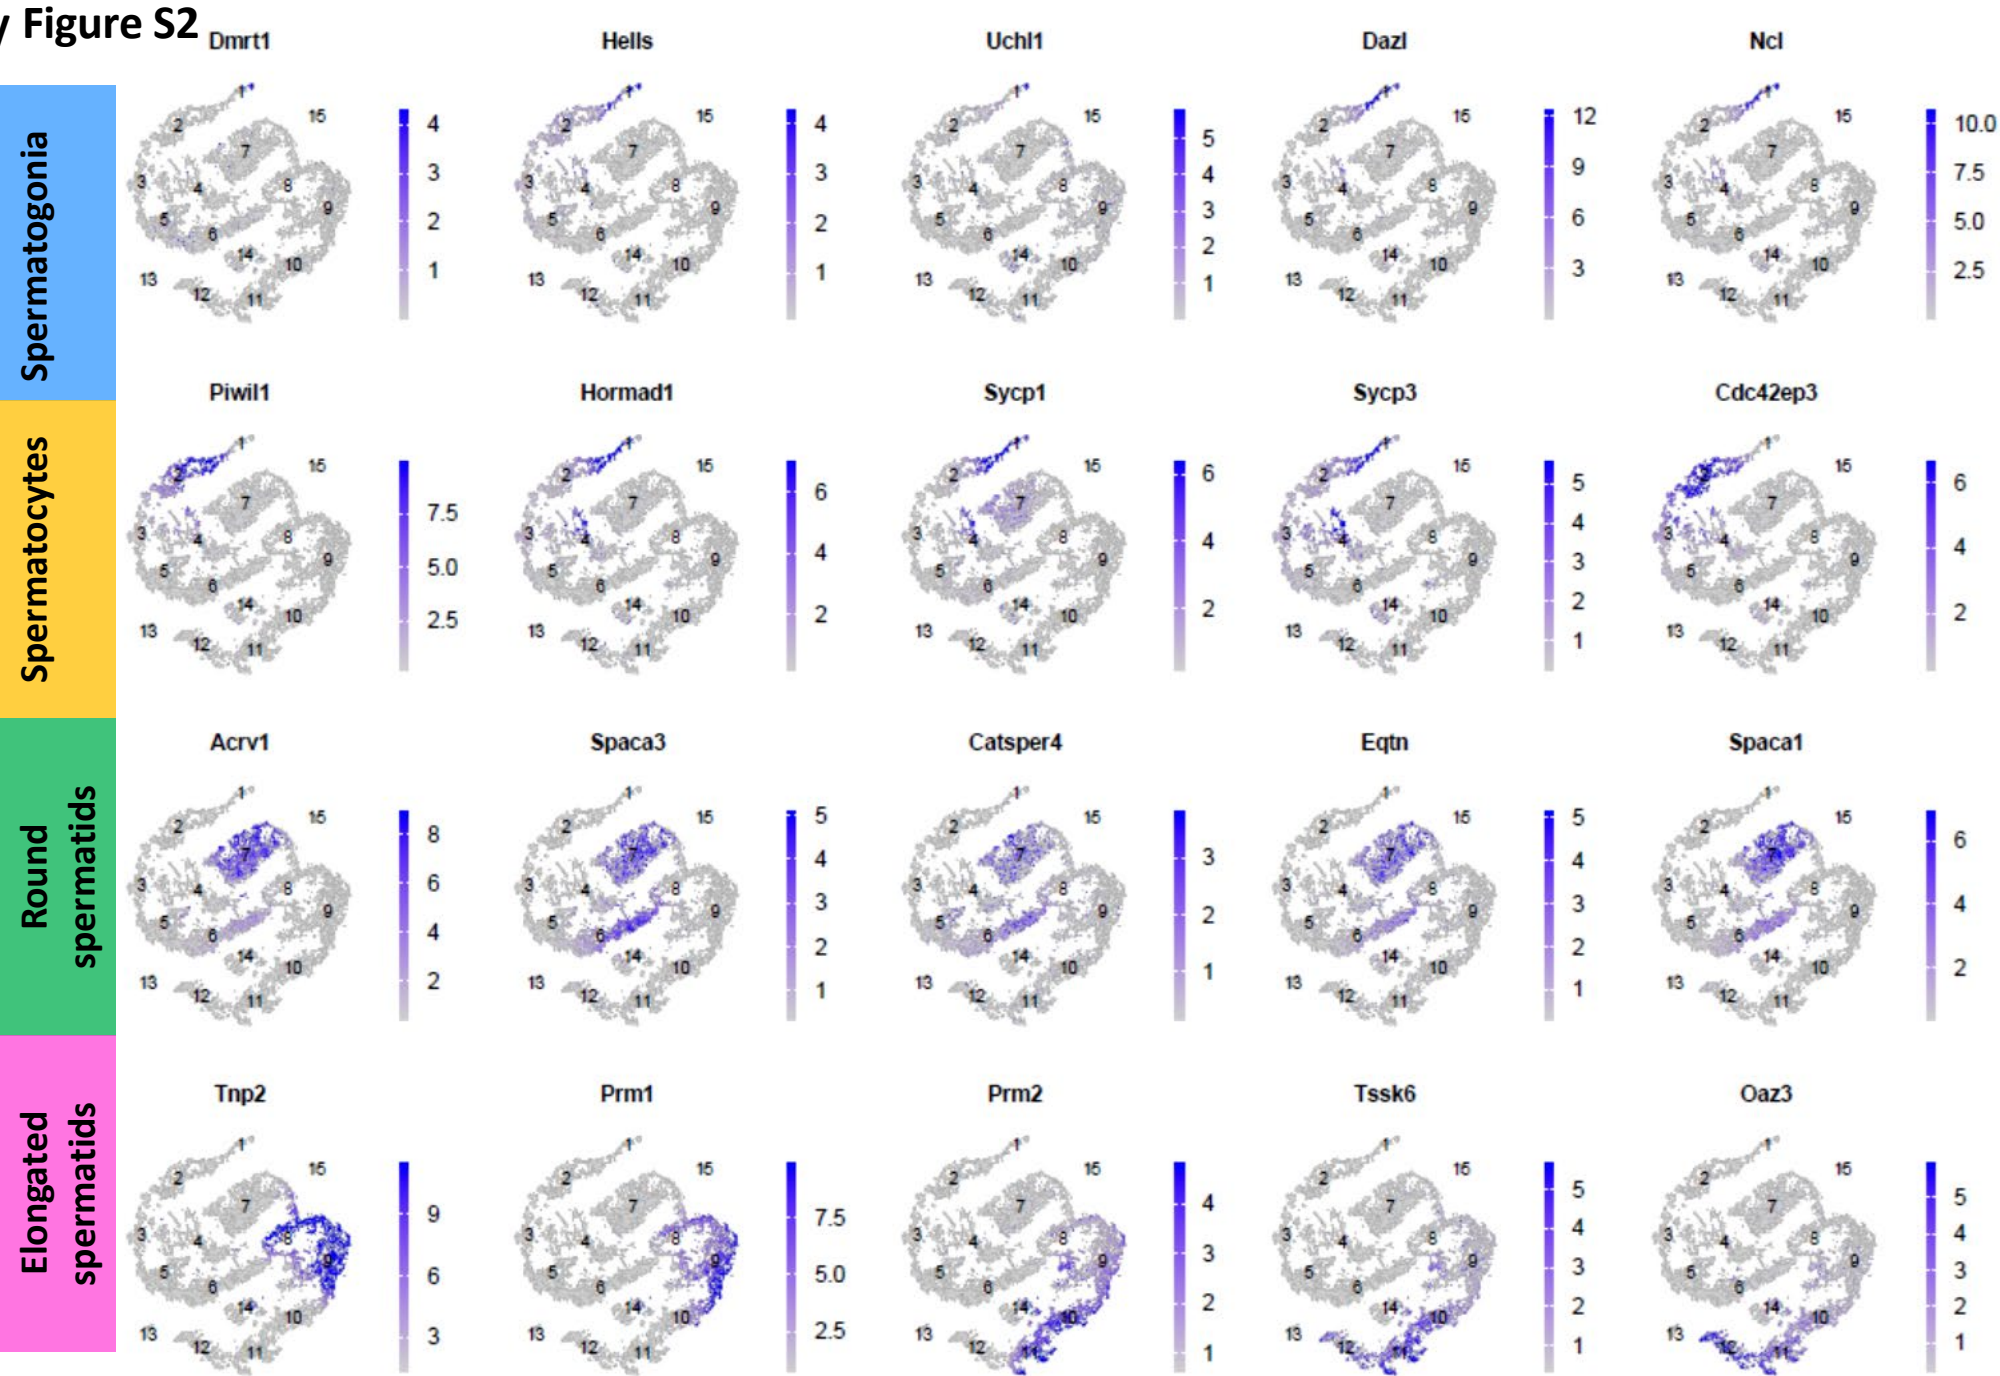

**Figure S3**

**Golgi phase**

**Cap phase**

**Acrosome phase**

**Maturation phase**

**A.**

**WT**

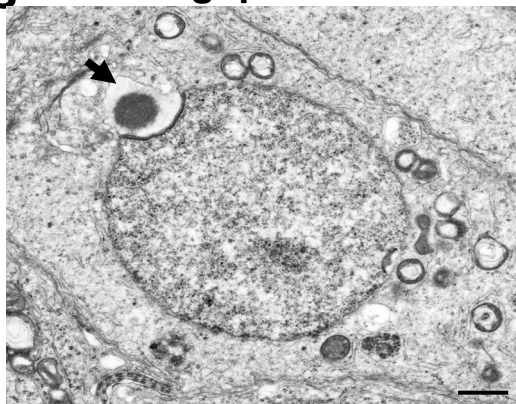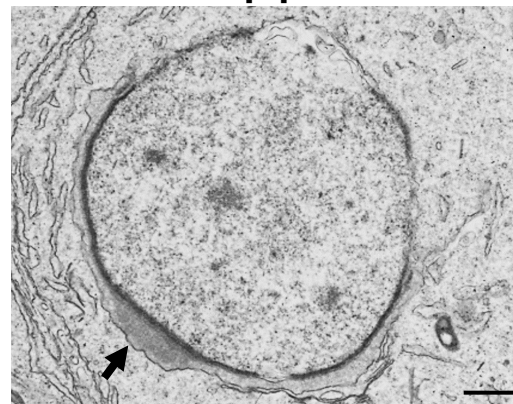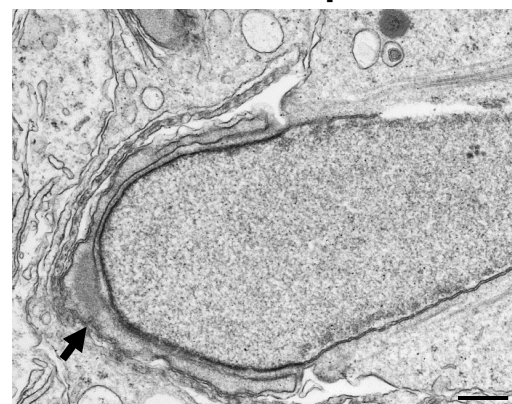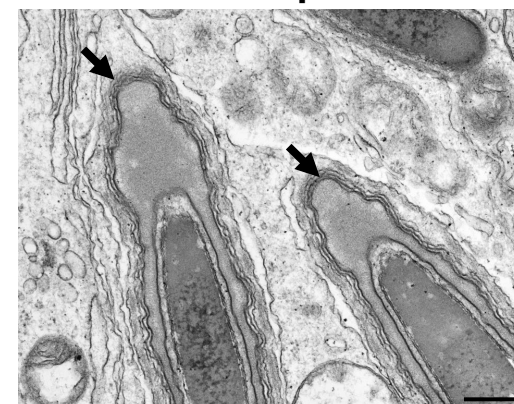

**B.**

**Golgi phase**

**Cap phase**

**KI**

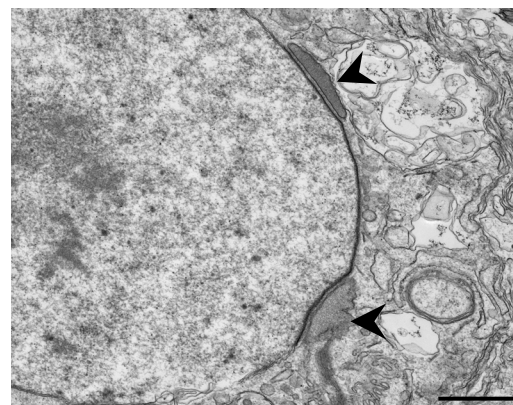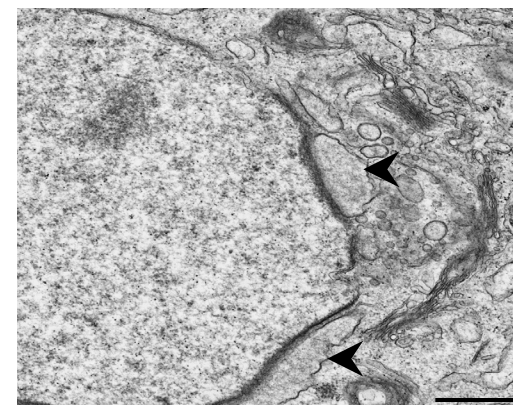

**KO**

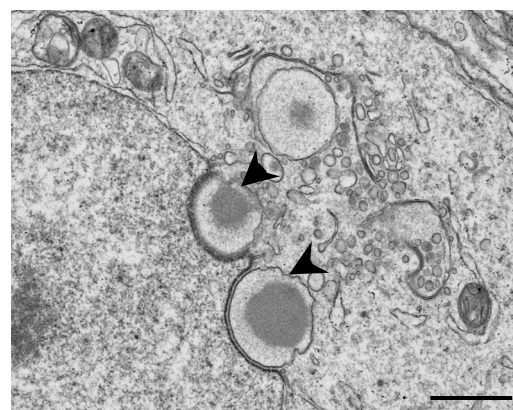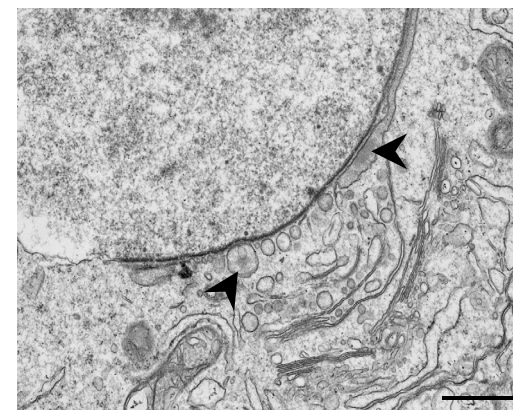

Supplement: s1 [file s1]
